# Supplementary material for: Comparing genome sequencing technologies to improve rare disease diagnostics: a protocol for the evaluation of a pilot project, Genome-wide Sequencing Ontario
Source: PubMed Central journal article supplement — CMAJ Open. 2022 May 24;10(2):E460–5. doi: 10.9778/cmajo.20210272 (PMC9259466; doi:10.9778/cmajo.20210272), 2022-05-24
Supplement: open-2021-0272-original-submission.pdf [file open-2021-0272-original-submission.pdf]

## Genome-wide Sequencing Ontario (GSO):

### A protocol to compare genome sequencing technologies to improve rare disease diagnostics

RZ Hayeems ScM, PhD<sup>1</sup>, CR Marshall PhD<sup>2</sup>, MK Gillespie HBSce, MSc<sup>3</sup>, A Szuto HBSce, MSc<sup>4</sup>,  
C Chisholm HBSce, MSc<sup>5</sup>, DJ Stavropoulos MSc, PhD<sup>2</sup>, V Venkataramanan MSc<sup>1</sup>, K Tsiplova  
MSc<sup>1</sup>, S Sawyer MD, PhD<sup>5</sup>, EM Price PhD<sup>3</sup>, L Lau MSc<sup>2</sup>, R Khan MA<sup>4</sup>, W Lee HBSce, MS<sup>1,4</sup>, L  
Huang PhD<sup>5</sup>, O Jarinova PhD<sup>5</sup>, WJ Ungar MSc, PhD<sup>1</sup>, R Mendoza MD, MSc<sup>4</sup>, MJ Somerville  
PhD, ErCLG<sup>2</sup>, KM Boycott MD, PhD<sup>3,5</sup>

1. Program in Child Health Evaluative Sciences, Hospital for Sick Children Research  
Institute, Toronto, ON, Canada, M5G 0A4
2. Department of Paediatric Laboratory Medicine, Hospital for Sick Children, Toronto, ON,  
Canada, M5G 1X8
3. Children's Hospital of Eastern Ontario Research Institute, University of Ottawa, Ottawa,  
ON, Canada, K1H 8L1
4. Division of Clinical and Metabolic Genetics, Hospital for Sick Children, Toronto, ON,  
Canada, M5G 1X8
5. Department of Genetics, Children's Hospital of Eastern Ontario, Ottawa, ON, Canada,  
K1H 8L1

For Submission to: *CMAJ Open (Protocol, 2500 words)*

1  
2  
3 **Abstract** (250 words)  
4

5 **Background:** Genome-wide sequencing (GWS) has emerged as a promising strategy for  
6 achieving timely diagnosis of rare diseases but is not yet available as a clinical test performed in  
7 Canadian diagnostic laboratories. Motivated to establish high quality, timely, cost effective, and  
8 equitable access to GWS for Ontarians, the *Genome-wide Sequencing Ontario (GSO)* pilot  
9 project has developed an innovative, harmonized, multi-institutional model for delivering clinical  
10 GWS. Herein we describe a protocol that aims to evaluate its performance in Ontario.  
11  
12  
13  
14  
15  
16  
17  
18

19 **Methods:** A prospective cohort of patients will be enrolled over a two-year period. Eligible  
20 cases for whom blood samples are available for the index case and both parents (i.e. trios) will be  
21 randomized to receive exome (ES) or genome sequencing (GS). Patient and process-level data as  
22 well as costs associated with the laboratory workflow for ES and GS will be ascertained. Point  
23 estimates for diagnostic utility and timeliness will be compared statistically for ES and GS and  
24 an incremental cost-effectiveness ratio, expressed as the incremental cost of GS compared to ES  
25 per additional patient with a causal variant detected, will be determined.  
26  
27  
28  
29  
30  
31  
32  
33  
34

35 **Implications:** Findings from this work will provide robust evidence of diagnostic utility, cost  
36 effectiveness, and timeliness of ES and GS. As the first Canadian study to compare the  
37 performance of these clinical-grade technologies, findings will inform provincial and cross-  
38 provincial policy related to the long-term organization, delivery, and reimbursement of genome-  
39 based diagnostics for rare disease.  
40  
41  
42  
43  
44  
45  
46  
47  
48  
49  
50  
51  
52  
53  
54  
55  
56  
57  
58  
59  
60

## Introduction

An accurate diagnosis is an essential component of care for rare disease patients, enabling tailored patient management, cascade family testing, family planning, and peer support (1).

Exome sequencing (ES) has emerged as a diagnostic test in many jurisdictions to facilitate diagnoses for patients with a suspected rare genetic disease (2-4). Extending the capabilities of ES, genome sequencing (GS) offers coverage of both coding and non-coding regions of the genome, and improved detection of copy number and structural variants (5). The term genome-wide sequencing (GWS) has emerged to refer to both ES and GS. In addition to its diagnostic capabilities, GWS can also identify secondary findings, defined as variants that are unrelated to the indication for testing but associated with medically actionable, often pre-symptomatic health risks (6). Despite the enhanced capabilities of GS compared to ES, a recent meta-analysis found that the diagnostic utility (i.e. rate of causative genotypes in known disease genes) of GS and ES were not significantly different (7). However, for both ES and GS, the likelihood of diagnosis was significantly greater when sequencing was performed on the index case plus two biological relatives (usually parents; referred to as trios) compared to the index case alone (i.e. referred to as singletons) (7). While studies of the cost effectiveness of ES and GS on a range of conditions are emerging (8-10), a recent systematic review of 36 studies concluded that the economic evidence base to support the use of ES and GS in the clinic is very limited and that robust comparative studies are urgently needed to support their translation into clinical practice (10).

Alongside this growing evidence base, the Ontario Ministry of Health (MOH), responsible for administering the health care system for Ontario's population of almost 15 million (11), has been instrumental in enabling access to clinical ES for Ontarians since 2014 through its Out-of-

1  
2  
3 Country/Out-of-Province (OOC/OOP) Prior Approval Program (12). The OOC/OOP Prior  
4  
5 Approval Program is an exceptional access mechanism that is in place in Ontario to allow the use  
6  
7 of services outside the province or country when they are not available in the province and if  
8  
9 specific criteria are met. These criteria are informed by relevant experts, stakeholders, and  
10  
11 available professional best practice statements. In Ontario, criteria for access to ES were based  
12  
13 on the Genetic Testing Advisory (GTAC) Committee's report (13), which itself was informed by  
14  
15 the Canadian College of Medical Geneticists' (CCMG) Position Statement on the clinical  
16  
17 implementation of GWS (14). In 2020, in response to the demand for local ES services, a  
18  
19 comprehensive health technology assessment of ES and GS for unexplained developmental  
20  
21 disabilities or multiple congenital anomalies was undertaken by Ontario Health. Based on the  
22  
23 evidence reviewed in this assessment, the Ontario Health Technology Advisory Committee  
24  
25 recommended public funding for ES as a second-tier test for these individuals (8,15).  
26  
27  
28  
29  
30  
31  
32

33 As a result of policy efforts and the evolution of exceptional access programs in Ontario and  
34  
35 other Canadian provinces in recent years, approximately 1500 Canadian patients with rare  
36  
37 disease, per year, receive access to clinical ES performed outside the country (16). While the  
38  
39 approach to date has enabled access to high-quality ES in a significant subset of eligible patients,  
40  
41 establishing local infrastructure is essential to enable the development of integrated laboratory  
42  
43 services, a knowledge base that is locally representative, and a performance measurement system  
44  
45 that will guide technical and policy decisions related to the use of this technology over time.  
46  
47

48 Motivated to further optimize a high quality, timely, cost effective, equitable, and sustainable  
49  
50 service for Ontarians, the objective of the *Genome-wide Sequencing Ontario* (GSO) protocol is  
51  
52 to evaluate the clinical performance and cost effectiveness of ES and GS locally. The first of its  
53  
54  
55  
56  
57  
58  
59  
60

1  
2  
3 kind in Canada, GSO will provide evidence to inform longer term technology adoption decisions  
4  
5 in Ontario and serve as a model for evidence development and clinical translation in other  
6  
7 jurisdictions for whom clinical GWS policy is a priority.  
8  
9

## 10 11 12 **Methods**

### 13 14 15 Design

16  
17 Informed by the strategies that have guided ES/GS implementation efforts internationally (17,  
18  
19 18), we have developed a two-year, prospective, hybrid implementation-effectiveness study  
20  
21 design tailored to Ontario's needs and resources (19). A design that blends components of  
22  
23 clinical effectiveness and implementation research, this approach enables more rapid  
24  
25 translational gains, more effective implementation strategies, and more useful information for  
26  
27 decision makers (19). Although not designed as a hypothesis-driven effectiveness trial,  
28  
29 participants are randomized to receive ES or GS to mitigate bias in determining and comparing  
30  
31 performance and implementation outcomes for these sequencing strategies.  
32  
33  
34  
35  
36  
37

### 38 39 Settings

40 GSO is co-hosted by the Genome Diagnostics Laboratories and Divisions of Clinical Genetics at  
41  
42 The Hospital for Sick Children (SickKids) and The Children's Hospital of Eastern Ontario  
43  
44 (CHEO) (Figure 1).  
45  
46  
47  
48

### 49 50 Intervention: Genome-wide sequencing

51 Routine (i.e. non-rapid) ES and GS are performed on the Novaseq6000 sequencing platform at  
52  
53 SickKids, followed by genome alignment and variant calling. Resulting variants undergo  
54  
55  
56  
57  
58  
59  
60

1  
2  
3 annotation, filtration, and interpretation. A cloud-based platform facilitates data flow between the  
4  
5 laboratories, analysis and delivery, storage, and sharing. The harmonized interpretation and  
6  
7 reporting protocols were developed by SickKids and CHEO laboratories based on technical  
8  
9 specifications developed by an expert working group established by the MOH Laboratories and  
10  
11 Genetics Branch (20).  
12  
13

### 14 15 16 17 Participants 18

19 The target population includes adults and children and aligns with the eligibility criteria for GWS  
20  
21 that are in use by Ontario's OOC/OOP Prior Approval Program, as established in the GTAC  
22  
23 Report (13) and the CCMG Position Statement (14). Specifically, eligible patients include those  
24  
25 for whom (a) a baseline genetics evaluation has been completed (e.g. phenotyping, family  
26  
27 history, pretest genetic counselling and consent and, where indicated, chromosome microarray,  
28  
29 targeted testing including biochemical testing), (b) a genetic etiology is the most likely  
30  
31 explanation for the phenotype, as supported by a clinical presentation that includes any one of  
32  
33 the following: (i) moderate to severe developmental or functional impairment, (ii) multisystem  
34  
35 involvement, (iii) progressive clinical course which cannot be explained by another cause; or (iv)  
36  
37 differential diagnosis that includes two or more conditions that would require evaluation by  
38  
39 separate gene panels, and (c) blood samples from the index patient and both parents (i.e. trios)  
40  
41 are available.  
42  
43  
44  
45  
46  
47  
48

49 Ineligible patients include those for whom (a) the clinical presentation is limited to: (i) isolated  
50  
51 mild intellectual disability or learning disabilities, (ii) non-syndromic autism, (iii) isolated neuro-  
52  
53 behavioural disabilities (e.g. attention deficit disorder), (iv) isolated neuropsychiatric conditions  
54  
55  
56  
57  
58  
59  
60

1  
2  
3 (e.g. schizophrenia) or (b) the phenotype is highly specific to a known genetic condition for  
4  
5 which optimized genetic testing (e.g. multi-gene panel) exists or is suggestive of an aneuploidy,  
6  
7 a methylation defect, or a trinucleotide repeat disorder. As an implementation project, the sample  
8  
9 size (n=650) is based on the OOC/OOP Program annual testing volumes for SickKids and  
10  
11 CHEO.  
12  
13

14  
15  
16  
17 Patients are enrolled prospectively and complete a clinical consent form that is harmonized  
18  
19 across sites to enable data-sharing between SickKids and CHEO laboratories, optimizing the  
20  
21 consistency of variant interpretation. Following completion of a genetics consultation during  
22  
23 which ES/GS is deemed indicated for a patient, the requisition and sample collection is  
24  
25 completed. All requisitions are reviewed by a genetic counsellor; if the patient meets eligibility  
26  
27 criteria, DNA is extracted and sent to the SickKids laboratory for sequencing. Requisitions for  
28  
29 testing of cases with uncertain eligibility are reviewed by a joint committee of clinical and  
30  
31 laboratory experts. If eligibility criteria are not met, testing does not proceed, and a rejection  
32  
33 report is issued to the ordering provider. For cases that are excluded, a physician can choose to  
34  
35 appeal, whereupon the joint committee process would be used to evaluate any substantive  
36  
37 additional clinical information or published evidence provided to support the case for testing. If  
38  
39 preferred, ordering providers can submit a request for pre-approval prior to sample collection.  
40  
41  
42  
43  
44  
45

#### 46 47 Randomization and matching 48

49 Patients are randomly assigned to ES or GS using a 1:1 ratio and an un-blinded stratified  
50  
51 permuted block randomization design. Cases are stratified by clinical site, phenotype, and  
52  
53  
54  
55  
56  
57  
58  
59  
60

1  
2  
3 molecular testing history. Depending on the expected recruitment in each stratum, block sizes  
4  
5 (i.e. number of patients in each strata) are 2, 4 or 6.  
6  
7  
8  
9

### 10 Data Collection

11  
12 A centralized REDCap database has been developed to capture a wide range of patient-level  
13  
14 process and outcome measures to enable the assessment of three core dimensions on quality care:  
15  
16 diagnostic utility, timeliness, and cost-effectiveness (21). Patient-level data include: (i) clinical  
17  
18 characteristics (i.e. enrolment site, age, physical features/symptoms, ethnicity, consanguinity,  
19  
20 molecular testing history, test urgency), (ii) patient preferences related to research re-contact and  
21  
22 receipt of secondary findings, (iii) number and characteristics of primary variants identified, and  
23  
24 (iv) number and characteristics of secondary findings identified. Patient characteristics and  
25  
26 preferences related to research recontact and receipt of secondary findings will be ascertained  
27  
28 from ES/GS requisition forms that are submitted to the laboratory and the result of the ES/GS  
29  
30 analyses will be obtained from the harmonized, cloud-based genome analysis platform.  
31  
32  
33  
34  
35  
36  
37

38 Process measures include details related to: (i) sample accessioning (i.e. date samples  
39  
40 received/accessioned,) (ii) genome analysis (i.e. dates analysis initiated and completed, date  
41  
42 results reported, time required for analysis), and (iii) segregation analysis (i.e. dates initiated and  
43  
44 reported, number of samples included, variant classification, parental inheritance). Process  
45  
46 measures will be ascertained from the SickKids and CHEO laboratory information systems. Data  
47  
48 collection will be facilitated by members of the study team and monitored monthly for data  
49  
50 accuracy and completion. Missing data identified through quality checks will be obtained by the  
51  
52  
53  
54  
55  
56  
57  
58  
59  
60



1  
2  
3 laboratory genetic counsellor from the ordering provider, technologist, genome analyst, or  
4  
5 director assigned to the case.  
6  
7  
8  
9

10 Costs for ES and GS will be determined by microcosting of laboratory workflow components for  
11 each sequencing approach (8, 15, 22, 23). Data on the volume of resource use and unit price for  
12 each workflow input will be obtained from laboratory protocols and managers. Diagnostic utility  
13 will be defined as the rate of causative, pathogenic, or likely pathogenic genotypes in known  
14 disease genes and reported as the proportion of cases for whom diagnostic, partially diagnostic,  
15 and medically-actionable secondary variants are identified. Timeliness will be defined from a  
16 laboratory perspective and measured as the number of weeks elapsed from sample accessioning  
17 to laboratory reporting and will be reported as the proportion of cases for whom laboratory  
18 turnaround time is <12 weeks. Cost-effectiveness will be reported as the incremental costs of  
19 local GS compared to ES per additional patient with a molecular diagnosis achieved.  
20  
21  
22  
23  
24  
25  
26  
27  
28  
29  
30  
31  
32  
33  
34

### 35 Statistical Analysis

36  
37 We will analyse our data using descriptive statistics (mean, median, range and standard  
38 deviation). Point estimates for diagnostic utility and timeliness will be compared statistically for  
39 ES and GS. We will examine the relationship between clinical characteristics (e.g. age, age of  
40 onset, sex, phenotype, prior testing history) and diagnostic yield using parametric or non-  
41 parametric univariate statistics as appropriate. If indicated, we will explore explanatory variables  
42 of diagnostic utility using a regression model. A cost per trio ES and cost per trio GS will be  
43 determined. Costs for each input related to the ES and GS laboratory workflows will be  
44 calculated by multiplying resource volume by unit price. For labour, time in minutes for each  
45  
46  
47  
48  
49  
50  
51  
52  
53  
54  
55  
56  
57  
58  
59  
60

1  
2  
3 task will be multiplied by wage rates. The most recently available price units will be used (2021).  
4  
5 Otherwise, the prices as reported in previous microcosting studies (22, 23) will be assumed to be  
6  
7 stable based on consultation with lab managers. The costs of laboratory workflow inputs for each  
8  
9 sequencing approach will be summed to determine a per sample cost. A cost-effectiveness  
10  
11 analysis will be undertaken from an institutional payer perspective in which the difference in  
12  
13 costs between GS and ES will be calculated and divided by the difference in diagnostic yield to  
14  
15 calculate an incremental cost-effectiveness ratio expressed as the incremental cost of GS  
16  
17 compared to ES per additional patient with a pathogenic variant detected. As an implementation  
18  
19 project, this CEA is limited to laboratory costs and outcomes. Given the complexity of diagnostic  
20  
21 outcomes and the heterogeneity of the patient sample, it will not be possible to model patients'  
22  
23 health states and the range of treatment options that might ensue from a given diagnostic result to  
24  
25 generate health benefits, such as QALYs, over a lifetime. All costs will be reported in 2021  
26  
27 Canadian dollars (CAD). SQUIRE reporting guidelines will be used (24).  
28  
29  
30  
31  
32  
33  
34

### 35 Ethics Approval

36  
37 Individuals undergoing GWS as part of this protocol provide clinical consent for GWS and  
38  
39 research consent through Clinical Trials Ontario [CTO-1577]; CTO is the provincial body  
40  
41 responsible for approving clinical trials and observational studies involving two or more  
42  
43 academic or health care institutions in Ontario.  
44  
45  
46  
47  
48

### 49 **Interpretation**

50  
51 This is the first Canadian study to compare the performance of these technologies and will be  
52  
53 instrumental in guiding provincial policy and funding decisions related to their ongoing use in  
54  
55  
56  
57  
58  
59  
60

1  
2  
3 clinical care. Findings from this work will provide robust evidence of diagnostic utility, cost  
4 effectiveness, and timeliness of clinical grade ES and GS. The relationship between key clinical  
5 characteristics (e.g. age, age of symptom onset, phenotype, prior testing history) and these  
6 performance outcomes will also be assessed to understand the relative performance of these  
7 technologies in different patient groups. In particular, our data will inform the development of  
8 diagnostic pathway guidelines for the use of ES and GS for different clinical indications and  
9 when the pathway should include ES versus GS. Finally, having established a centralized  
10 sequencing-distributed interpretation model between two sites, data collected herein will inform  
11 the feasibility and costs of scaling this model across the province.  
12  
13  
14  
15  
16  
17  
18  
19  
20  
21  
22  
23  
24  
25

### 26 **Knowledge Translation**

27  
28 In addition to disseminating our findings through academic publications and presentations, we  
29 will generate a report for the provincial policy partners who have been engaged in the design and  
30 implementation of this work. We will also develop educational materials for an expanding  
31 network of ordering providers to improve genomic literacy among non-genetics providers and  
32 generate lay summaries of our findings for the rare disease patient community.  
33  
34  
35  
36  
37  
38  
39  
40  
41

### 42 **Limitations**

43  
44 The primary limitations of this work relate to the inclusion of cases from only two clinical sites  
45 in Ontario and the restricted inclusion criteria. With an emphasis on pediatric patients with  
46 neurodevelopmental phenotypes, findings related to the performance of ES and GS may be  
47 limited in their generalizability to adult patients with rare disease and to those with non-  
48 neurodevelopmental phenotypes.  
49  
50  
51  
52  
53  
54  
55  
56  
57  
58  
59  
60

### **Opportunities for future research**

All patients are provided with the option to participate in future research as part of their clinical consent process. Patients that consent to re-contact are able to enrol in additional REB-approved studies linked to GSO including: (a) clinical re-analysis of genomic data and (b) the patient and system impacts of medically actionable secondary findings. Findings from these particular studies will inform best practices and guidelines for clinical re-analysis and for managing secondary findings in a single-payer healthcare system. GSO participants will also be able to enrol in other rare disease research initiatives focused on gene discovery, characterizing natural history, and trialing precision therapies (25).

### **Conclusion**

This protocol lays the foundation for ongoing development and implementation of clinical ES and GS technologies. Moving beyond Ontario, we will engage our clinical, research, policy, and funding partners to understand province-specific barriers and facilitators of ES and GS implementation and strategize – as a community of practice invested in the equitable and sustainable delivery of high-quality genomic medicine – to develop concrete implementation structures and processes for Canadians. Going forward, our evaluation framework will not only serve to monitor performance and inform continuous system improvement, it will also guide our evaluation of emerging -omic technologies and applications in the years to come.

1  
2  
3 **Data-Sharing Statement:** As data collection is underway, data are not currently available to or  
4 accessible by others.  
5

6 **Acknowledgements:** The authors wish to acknowledge the support and guidance of Dr. Cynthia  
7 Ho and Ms. Neeta Sarta as representatives of the Laboratory and Genetics Branch, Ontario  
8  
9 Ministry of Health, Toronto, ON, Canada, M7A 0A5.  
10  
11  
12

13  
14  
15 **Contributor's Statement:**

16 RZH, CRM, MKG, AS, CC, JS, EMP, RK, WL, LH, OJ, WJU, RM, MS, KMB contributed  
17 substantially to conception and design  
18

19 RZH, CRM, MKG, AS, CC, JS, EMP, RK, WL, LH, OJ, WJU, RM, MS, KMB drafted the  
20 article or revised it critically for important intellectual content  
21

22 RZH, CRM, KMB, MS gave final approval of the version to be published  
23

24 RZH, CRM, KMB, MS agreed to act as guarantor of the work (ensuring that questions related to  
25 any part of the work are appropriately investigated and resolved).  
26  
27

28  
29 **Funding Statement:** Funding was provided by the Government of Canada through Genome  
30 Canada and the Ontario Genomics Institute (OGI-186).  
31  
32  
33

34  
35  
36 **LIST OF FIGURES**  
37

38 Figure 1: GSO Structure and Settings (see attached ppt file)  
39  
40  
41  
42  
43  
44  
45  
46  
47  
48  
49  
50  
51  
52  
53  
54  
55  
56  
57  
58  
59  
60

## References

1. Boycott KM, Vanstone M, Bulman DE, MacKenzie AE. Rare-disease genetics in the era of next-generation sequencing: discovery to translation. *Nature Reviews Genetics* 2013 Oct;14(10):681-91.
2. Stark Z, Tan TY, Chong B, Brett GR, Yap P, Walsh M, et al. A prospective evaluation of whole-exome sequencing as a first-tier molecular test in infants with suspected monogenic disorders. *Genet Med*. 2016;18(11):1090-6.
3. Meng L, Pammi M, Saronwala A, Magoulas P, Ghazi AR, Vetrini F, et al. Use of Exome Sequencing for Infants in Intensive Care Units: Ascertainment of Severe Single-Gene Disorders and Effect on Medical Management. *JAMA Pediatr*. 2017;171(12):e173438.
4. Delaney SK, Hultner ML, Jacob HJ, Ledbetter DH, McCarthy JJ, Ball M, et al. Toward clinical genomics in everyday medicine: perspectives and recommendations. *Expert Rev Mol Diagn*. 2016;16(5):521-32.
5. Lelieveld SH, Spielmann M, Mundlos S, Veltman JA, Gilissen C. Comparison of Exome and Genome Sequencing Technologies for the Complete Capture of Protein-Coding Regions. *Hum Mutat*. 2015;36(8):815-22.
6. Miller DT, Lee K, Chung WK, et al. ACMG SF v3.0 list for reporting of secondary findings in clinical exome and genome sequencing: a policy statement of the American College of Medical Genetics and Genomics (ACMG). *Genetics in Medicine*. 2021. Cohn I, Paton TA, Marshall CR, Basran R, Stavropoulos DJ, Ray PN, et al. Genome sequencing as a platform for pharmacogenetic genotyping: a pediatric cohort study. *NPJ genomic medicine*. 2017;2:19.
7. Clark MM, Stark Z, Farnaes L, Tan TY, White SM, Dimmock D, et al. Meta-analysis of the diagnostic and clinical utility of genome and exome sequencing and chromosomal microarray in children with suspected genetic diseases. *NPJ genomic medicine*. 2018;3:16.
8. Li C, Vandersluis S, Holubowich C, Ungar WJ, Goh ES, Boycott KM, et al. Cost-effectiveness of genome-wide sequencing for unexplained developmental disabilities and multiple congenital anomalies. *Genetics in Medicine*. 2020.
9. Yuen T, Carter MT, Szatmari P, Ungar WJ. Cost-effectiveness of Genome and Exome Sequencing in Children Diagnosed with Autism Spectrum Disorder. *Appl Health Econ Health Policy*. 2018;16(4):481-93.
10. Schwarze K, Buchanan J, Taylor JC, Wordsworth S. Are whole-exome and whole-genome sequencing approaches cost-effective? A systematic review of the literature. *Genet Med*. 2018;20(10):1122-30.
11. Statistics Canada. Table 17-10-0009-01 Population estimates, quarterly. 2021.
12. Ontario Ministry of Health and Long-Term Care. Ontario Health Insurance Plan: OHIP Out of Country Approval Program 2018 [Available from: [https://www.health.gov.on.ca/en/public/programs/ohip/outofcountry/prior\\_approval.aspx](https://www.health.gov.on.ca/en/public/programs/ohip/outofcountry/prior_approval.aspx).
13. Genetic Testing Advisory Committee. Use of Genome-Wide Sequencing for Undiagnosed Rare Genetic Diseases in Ontario, Final Report from the Working Group for the Use of Genome-Wide Sequencing for Undiagnosed Rare Genetic Diseases in Ontario 2016 [Available from: [http://www.health.gov.on.ca/en/pro/programs/gtac/docs/gtac\\_report\\_use\\_of\\_gws\\_for\\_undiagnosed\\_rare\\_genetic\\_diseases.pdf](http://www.health.gov.on.ca/en/pro/programs/gtac/docs/gtac_report_use_of_gws_for_undiagnosed_rare_genetic_diseases.pdf).

14. Boycott K, Hartley T, Adam S, Bernier F, Chong K, Fernandez BA, et al. The clinical application of genome-wide sequencing for monogenic diseases in Canada: Position Statement of the Canadian College of Medical Geneticists. *J Med Genet*. 2015;52(7):431-7.
15. Ontario Health Quality. Genome-Wide Sequencing for Unexplained Developmental Disabilities or Multiple Congenital Anomalies: A Health Technology Assessment 2020 [Available from: <https://www.hqontario.ca/Portals/0/Documents/evidence/reports/hta-genome-wide-sequencing.pdf>].
16. Bell, C. [Pathway to the Clinical Implementation of Genome-Wide Sequencing for Rare Disease \(PDF\)](#) Genome Canada Accessed on: October 4 2022.
17. Turnbull C, Scott RH, Thomas E, Jones L, Murugaesu N, Pretty FB, et al. The 100 000 Genomes Project: bringing whole genome sequencing to the NHS. *Bmj*. 2018;361:k1687.
18. Stark Z, Boughtwood T, Phillips P, Christodoulou J, Hansen DP, Braithwaite J, et al. Australian Genomics: A Federated Model for Integrating Genomics into Healthcare. *Am J Hum Genet*. 2019;105(1):7-14.
19. Curran GM, Bauer M, Mittman B, Pyne JM, Stetler C. Effectiveness-implementation hybrid designs: combining elements of clinical effectiveness and implementation research to enhance public health impact. *Med Care*. 2012;50(3):217-26.
20. Technical Specifications Working Group for Clinical Genomic Testing in Ontario. Technical Specifications for Clinical Exome and Genome Sequencing in Constitutional Disease Testing in Ontario submitted to the Laboratories and Genetics Branch, Ontario Ministry of Health. April 2019.
21. Krahn M, Miller F, Bayoumi A, Brooker AS, Wagner F, Winsor S, et al. Development of the Ontario Decision Framework: A Values based framework for health technology assessment. *Int J Technol Assess Health Care*. 2018;34(3):290-9.
22. Tshiplova K, Zur RM, Marshall CR, Stavropoulos DJ, Pereira SL, Merico D, et al. A microcosting and cost-consequence analysis of clinical genomic testing strategies in autism spectrum disorder. *Genet Med*. 2017;19(11):1268-75.
23. Jegathisawaran J, Tshiplova K, Hayeems R, Ungar WJ. Determining accurate costs for genomic sequencing technologies-a necessary prerequisite. *J Community Genet*. 2020;11(2):235-8.
24. Orgrinc G, Davies L, Goodman D, Batalden P, Davidoff F, Stevens D. SQUIRE 2.0 (Standards for Quality Improvement Reporting Excellence): revised publication guidelines from a detailed consensus process.
25. Genome Canada. All for One Policy Toolkit 2019 [Available from: <https://www.genomecanada.ca/en/all-one-policy-toolkit>].

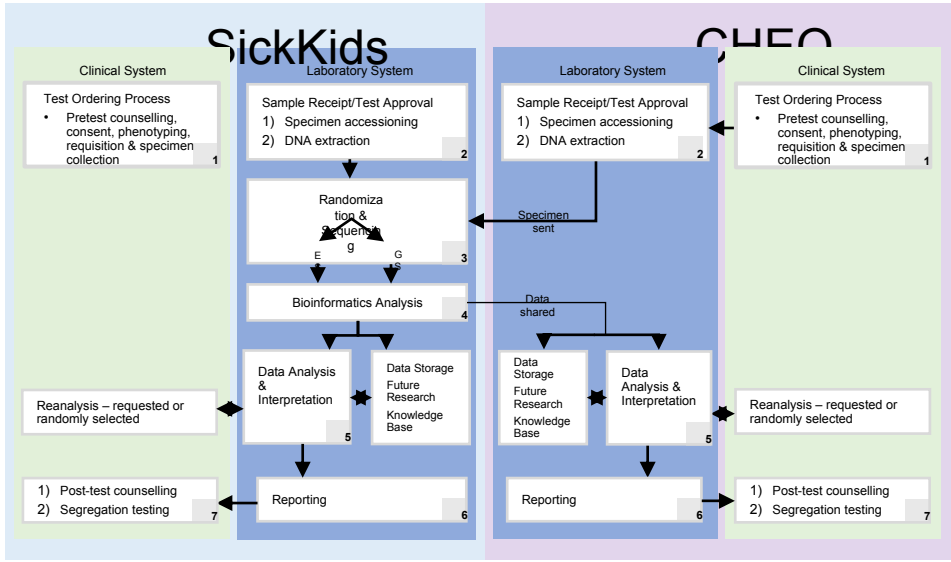

**Figure 1:** GSO's harmonized, multi-institutional model for delivering GWS  
 GS = genome sequencing, ES = exome sequencing

1  
2  
3  
4  
5  
6  
7  
8  
9  
10  
11  
12  
13  
14  
15  
16  
17  
18  
19  
20  
21  
22  
23  
24  
25  
26  
27  
28  
29  
30  
31  
32  
33  
34  
35  
36  
37  
38  
39  
40  
41
